# Supplementary material for: Global distribution of methane emissions: a comparative inverse analysis of observations from the TROPOMI and GOSAT satellite instruments
Source: Copernicus journal article supplement (doi:10.5194/acp-21-14159-2021), 2021-09-24
Supplement: Supplementary file 1 [file acp-21-14159-2021-supplement.pdf]

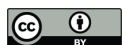

*Supplement of*

## **Global distribution of methane emissions: a comparative inverse analysis of observations from the TROPOMI and GOSAT satellite instruments**

**Zhen Qu et al.**

*Correspondence to:* Zhen Qu ([zhenqu@g.harvard.edu](mailto:zhenqu@g.harvard.edu))

The copyright of individual parts of the supplement might differ from the article licence.

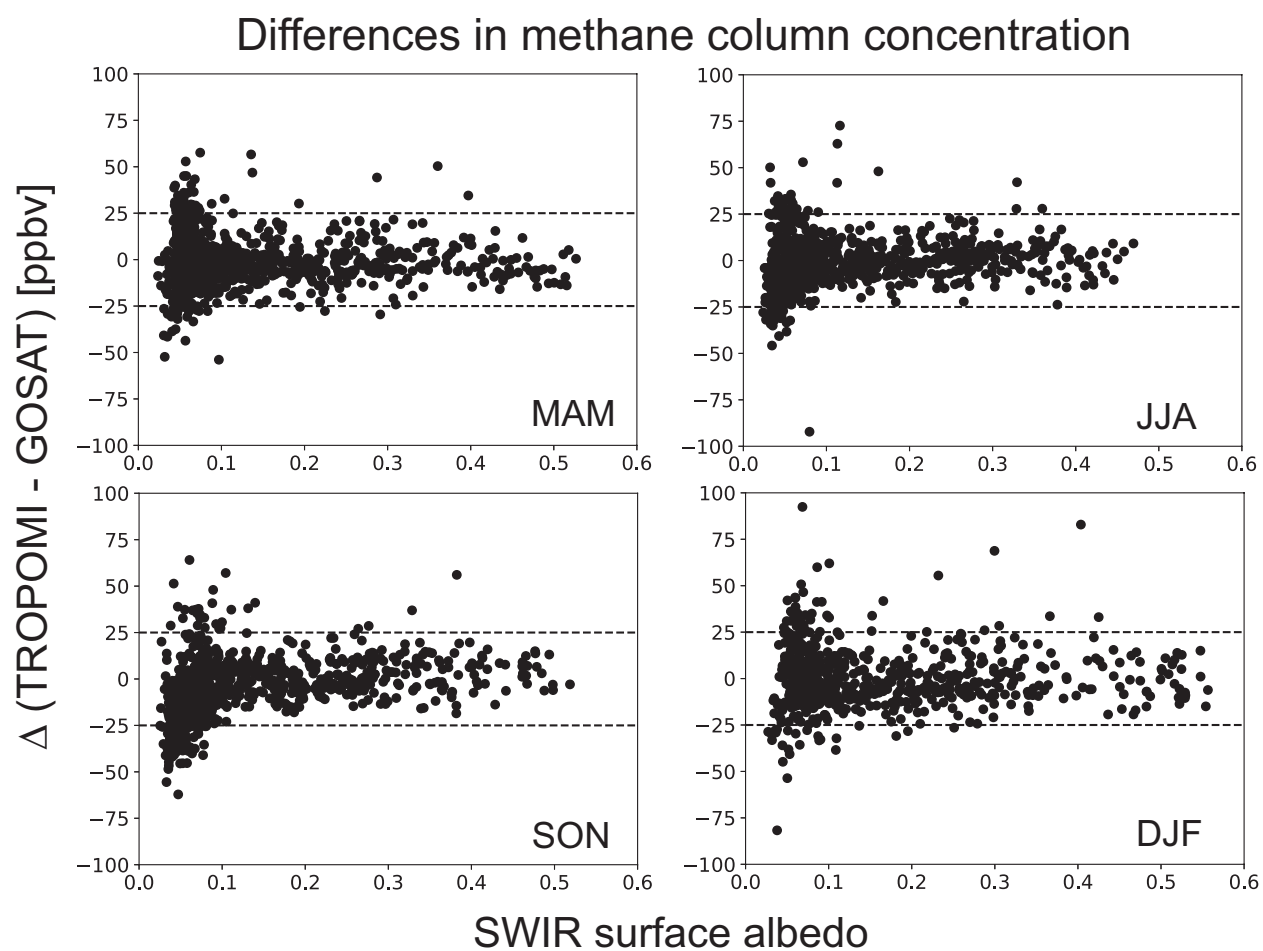

**Figure S1.** Seasonally averaged differences ( $\Delta$ ) of  $X_{\text{CH}_4}$  between TROPOMI and GOSAT retrievals for May 2018 – April 2019 at different SWIR surface albedo.

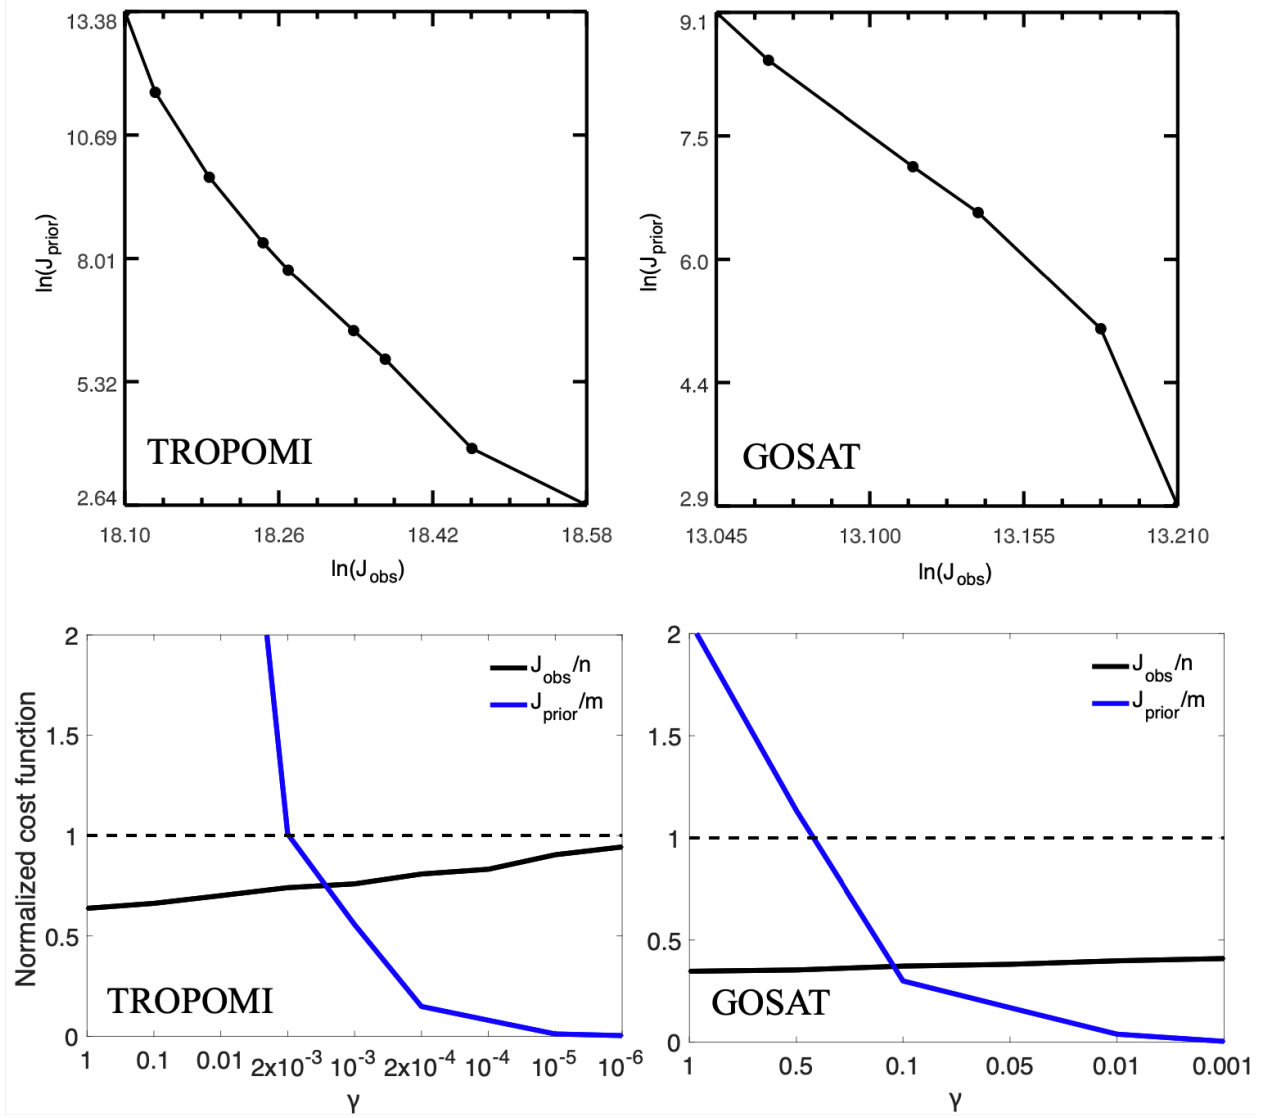

**Figure S2.** Dependence of the inverse modeling solution on the regularization parameter  $\gamma$  for TROPOMI (left column) and GOSAT (right column).  $J_{\text{obs}}$  and  $J_{\text{prior}}$  stand for the prior term  $(\mathbf{x} - \mathbf{x}_a)^T \mathbf{S}_a^{-1} (\mathbf{x} - \mathbf{x}_a)$  and the observation term  $(\mathbf{y} - \mathbf{Kx})^T \mathbf{S}_o^{-1} (\mathbf{y} - \mathbf{Kx})$  in the cost function.  $m$  and  $n$  are number of parameters and observations. Selected  $\gamma$  values in the test are: 1, 0.1, 0.01, 0.002, 0.001, 0.0002, 0.0001,  $10^{-5}$ ,  $10^{-6}$  for the TROPOMI inversion and 1, 0.5, 0.1, 0.05, 0.01, and 0.001 for the GOSAT inversion. We chose  $\gamma = 0.002$  (TROPOMI) and 0.5 (GOSAT) based on the corner of L-curve and the ratio between  $J_{\text{prior}}$  and  $n$ .

## Averaging kernel sensitivities (Joint - GOSAT)

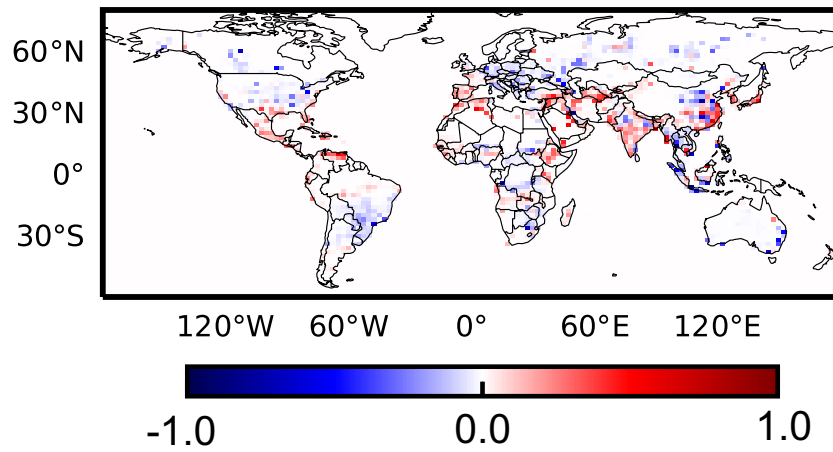

**Figure S3.** Differences between averaging kernel from the joint inversion and GOSAT inversion.

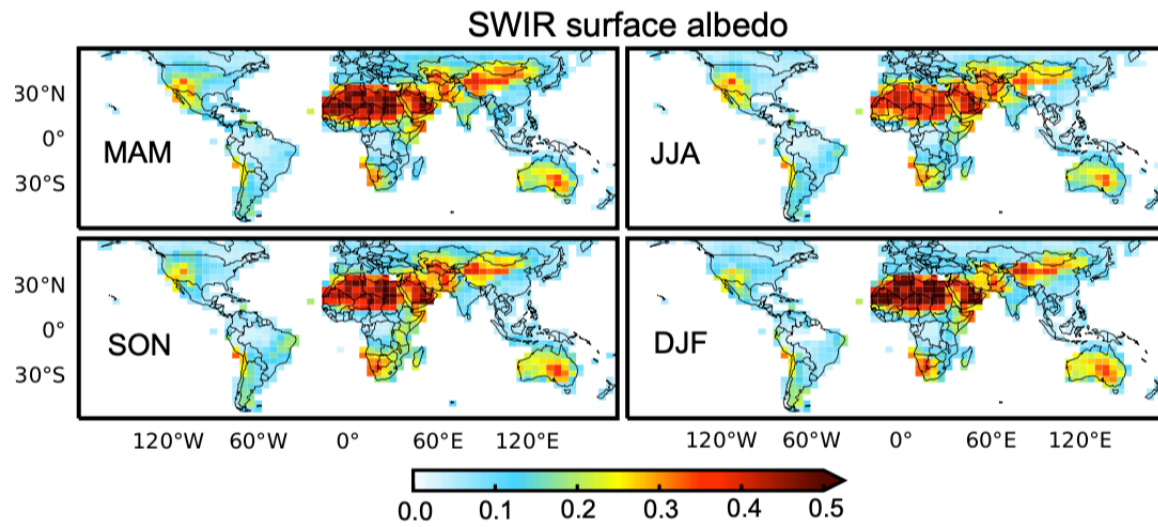

**Figure S4.** Seasonally averaged SWIR surface albedo for May 2018 – April 2019.

**Table S1.** Global methane budget in 2019 from the TROPOMI sensitivity inversions.

|                      | Base<br>inversion<br>[Tg a <sup>-1</sup> ] | $\gamma = 0.02$<br>[Tg a <sup>-1</sup> ] | $\gamma = 0.5$<br>[Tg a <sup>-1</sup> ] | $\gamma = 0.002$ , no<br>weighting [Tg<br>a <sup>-1</sup> ] | $\gamma = 0.002$ ,<br>weight = 1<br>for wetland<br>[Tg a <sup>-1</sup> ] | $\gamma = 0.002$ ,<br>weight =<br>2010 for OH<br>[Tg a <sup>-1</sup> ] |
|----------------------|--------------------------------------------|------------------------------------------|-----------------------------------------|-------------------------------------------------------------|--------------------------------------------------------------------------|------------------------------------------------------------------------|
| <b>Total sources</b> | <b>556</b>                                 | <b>577</b>                               | <b>593</b>                              | <b>479</b>                                                  | <b>571</b>                                                               | <b>574</b>                                                             |
| Non-wetland          | 361                                        | 357                                      | 391                                     | 348                                                         | 389                                                                      | 375                                                                    |
| Wetland              | 195                                        | 220                                      | 202                                     | 131                                                         | 182                                                                      | 199                                                                    |
| <b>Total sinks</b>   | <b>543</b>                                 | <b>546</b>                               | <b>559</b>                              | <b>471</b>                                                  | <b>555</b>                                                               | <b>560</b>                                                             |
| OH oxidation         | 468 <sup>a</sup>                           | 471 <sup>b</sup>                         | 484 <sup>c</sup>                        | 396 <sup>d</sup>                                            | 479 <sup>e</sup>                                                         | 485 <sup>f</sup>                                                       |
| Other losses         | 75                                         | 75                                       | 75                                      | 75                                                          | 76                                                                       | 75                                                                     |
| <b>Imbalance</b>     | <b>13</b>                                  | <b>31</b>                                | <b>34</b>                               | <b>8</b>                                                    | <b>16</b>                                                                | <b>14</b>                                                              |

<sup>a</sup> Posterior methane has a lifetime of 11.1 years against oxidation by tropospheric OH.

<sup>b</sup> Posterior methane has a lifetime of 11.0 years against oxidation by tropospheric OH.

<sup>c</sup> Posterior methane has a lifetime of 10.7 years against oxidation by tropospheric OH.

<sup>d</sup> Posterior methane has a lifetime of 13.0 years against oxidation by tropospheric OH.

<sup>e</sup> Posterior methane has a lifetime of 11.1 years against oxidation by tropospheric OH.

<sup>f</sup> Posterior methane has a lifetime of 10.7 years against oxidation by tropospheric OH.

**Table S2.** Global methane budget in 2019 from the GOSAT sensitivity inversions.

|                      | Base<br>inversion | $\gamma = 0.002$<br>[Tg a <sup>-1</sup> ] | $\gamma = 0.02$<br>[Tg a <sup>-1</sup> ] | $\gamma = 0.5$ , no<br>weighting<br>[Tg a <sup>-1</sup> ] | $\gamma = 0.5$ ,<br>weight = 1<br>for<br>wetland<br>[Tg a <sup>-1</sup> ] | $\gamma = 0.5$ ,<br>weight =<br>2010 for<br>OH [Tg a <sup>-1</sup> ] |
|----------------------|-------------------|-------------------------------------------|------------------------------------------|-----------------------------------------------------------|---------------------------------------------------------------------------|----------------------------------------------------------------------|
| <b>Total sources</b> | <b>562</b>        | <b>569</b>                                | <b>569</b>                               | <b>575</b>                                                | <b>583</b>                                                                | <b>551</b>                                                           |
| Non-wetland          | 399               | 403                                       | 398                                      | 391                                                       | 404                                                                       | 395                                                                  |
| Wetland              | 163               | 166                                       | 171                                      | 184                                                       | 179                                                                       | 156                                                                  |
| <b>Total sinks</b>   | <b>543</b>        | <b>559</b>                                | <b>556</b>                               | <b>545</b>                                                | <b>555</b>                                                                | <b>533</b>                                                           |
| OH oxidation         | 468 <sup>a</sup>  | 484 <sup>b</sup>                          | 481 <sup>c</sup>                         | 470 <sup>d</sup>                                          | 480 <sup>e</sup>                                                          | 458 <sup>f</sup>                                                     |
| Other losses         | 75                | 75                                        | 75                                       | 75                                                        | 75                                                                        | 75                                                                   |
| <b>Imbalance</b>     | <b>19</b>         | <b>10</b>                                 | <b>13</b>                                | <b>30</b>                                                 | <b>33</b>                                                                 | <b>18</b>                                                            |

<sup>a</sup> Posterior methane has a lifetime of 11.1 years against oxidation by tropospheric OH.

<sup>b</sup> Posterior methane has a lifetime of 10.7 years against oxidation by tropospheric OH.

<sup>c</sup> Posterior methane has a lifetime of 10.8 years against oxidation by tropospheric OH.

<sup>d</sup> Posterior methane has a lifetime of 11.1 years against oxidation by tropospheric OH.

<sup>e</sup> Posterior methane has a lifetime of 10.8 years against oxidation by tropospheric OH.

<sup>f</sup> Posterior methane has a lifetime of 10.8 years against oxidation by tropospheric OH.
